# Supplementary material for: Differences between intrinsic and acquired nucleoside analogue resistance in acute myeloid leukaemia cells
Source: Springer Nature journal article supplement (doi:10.1186/s13046-021-02093-4), 2021-10-12
Supplement: MOESM10 [file 13046_2021_2093_MOESM10_ESM.pdf]

**Supplementary Table 1.** CNDAC concentrations that reduce AML cell viability by 50% ( $IC_{50}$ ), relative SAMHD1 protein levels, quantified using near-infrared Western blot images to determine the ratio SAMHD1/ GAPDH, and CNDAC-triphosphate levels determined by LC-MS/MS.

|            | $IC_{50}$ CNDAC<br>[nM] | rel. SAMHD1<br>protein level | CNDAC-TP<br>[cps x $10^5$ ] |
|------------|-------------------------|------------------------------|-----------------------------|
| HEL        | 169 ± 17                | 0.0096 ± 0.0046              | 7.36 ± 0.82                 |
| HL-60      | 15 ± 3                  | 0.0002 ± 0.0002              | 7.17 ± 0.73                 |
| KG-1       | 266 ± 39                | 0.0143 ± 0.0087              | 1.74 ± 0.13                 |
| ML-2       | 298 ± 27                | 0.1043 ± 0.0470              | 0.35 ± 0.04                 |
| MOLM-13    | 201 ± 26                | 0.0989 ± 0.0256              | 0.31 ± 0.03                 |
| MONO-MAC-6 | 1524 ± 179              | 0.9465 ± 0.2152              | 0.44 ± 0.07                 |
| MV4-11     | 565 ± 30                | 0.5404 ± 0.1500              | 0.00 ± 0.00                 |
| NB4        | 122 ± 11                | 0.0788 ± 0.0151              | 0.57 ± 0.03                 |
| OCI-AML-2  | 230 ± 11                | 0.4212 ± 0.0936              | 0.00 ± 0.00                 |
| OCI-AML-3  | 331 ± 39                | 0.3442 ± 0.0897              | 0.20 ± 0.02                 |
| PL-21      | 77 ± 9                  | 0.0004 ± 0.0003              | 11.07 ± 0.68                |
| SIG-M5     | 351 ± 2                 | 0.2083 ± 0.0330              | 0.09 ± 0.07                 |
| THP-1      | 1598 ± 177              | 1.0000 ± 0.0000              | 0.00 ± 0.00                 |
